# Supplementary material for: Atypical Integration of Sensory-to-Transmodal Functional Systems Mediates Symptom Severity in Autism
Source: PubMed Central journal article supplement (PMC8417581; doi:10.3389/fpsyt.2021.699813), 2021-08-20
Supplement: Data_Sheet_1.pdf [file Data_Sheet_1.pdf]

## *Supplementary Material*

# **Atypical integration of sensory-to-transmodal functional systems mediates symptom severity in autism**

**Shinwon Park<sup>1,2</sup>, Koen V. Haak<sup>3</sup>, Han Byul Cho<sup>1,2</sup>, Sofie L. Valk<sup>4,5</sup>, Richard A. I. Bethlehem<sup>6,7</sup>, Michael P. Milham<sup>8,9</sup>, Boris Bernhardt<sup>10</sup>, Adriana Di Martino<sup>11</sup>, Seok-Jun Hong<sup>1,2,8\*</sup>**

<sup>1</sup>IBS Center for Neuroscience Imaging Research, Sungkyunkwan University, Suwon, South Korea

<sup>2</sup>Department of Biomedical Engineering, Sungkyunkwan University, Suwon, South Korea

<sup>3</sup>Donders Institute of Brain, Cognition and Behaviour, Radboud University Medical Center, 6500HB Nijmegen, the Netherlands

<sup>4</sup>Otto Hahn Group Cognitive Neurogenetics, Max Planck Institute for Human Cognitive and Brain Sciences, Leipzig, Germany

<sup>5</sup>INM-7, FZ Jülich, Jülich, Germany

<sup>6</sup>Autism Research Centre, Department of Psychiatry, University of Cambridge, Cambridge, UK

<sup>7</sup>Brain Mapping Unit, Department of Psychiatry, University of Cambridge, Cambridge, UK

<sup>8</sup>Center for the Developing Brain, Child Mind Institute, NY, USA

<sup>9</sup>Nathan S. Kline Institute for Psychiatric Research, NY, USA

<sup>10</sup>Montreal Neurological Institute and Hospital, McGill University, Quebec, Canada

<sup>11</sup>Autism Center, Child Mind Institute, NY, USA

**Supplementary Table 1.** Demographic and clinical characteristics of the ABIDE-II dataset

|                          | <b>ASD (n=57)</b> | <b>NT (n=59)</b> | <b>Statistical test</b> |       |
|--------------------------|-------------------|------------------|-------------------------|-------|
|                          | mean (SD)         | mean (SD)        | t                       | p     |
| Age (years)              | 12.1 (5.89)       | 16.5 (8.21)      | -3.30                   | 0.001 |
| Sex (F/M)                | 6/51              | 13/46            | 2.80 <sup>a</sup>       | 0.09  |
| Mean FD                  | 0.22 (0.21)       | 0.14 (0.16)      | 2.28                    | 0.02  |
| ADOS-Total               | 10.5 (4.17)       | NA               | NA                      | NA    |
| ADOS-Repetitive behavior | 1.04 (1.43)       | NA               | NA                      | NA    |
| ADOS-Communication       | 3.27 (1.89)       | NA               | NA                      | NA    |
| ADOS-Social              | 7.20 (2.75)       | NA               | NA                      | NA    |

<sup>a</sup>Group difference in sex was evaluated by the  $\chi^2$  tests. ASD, autism spectrum disorder; NT, neurotypical control; SD, standard deviation; F, female; M, male; FD, framewise displacement; ADOS, Autism Diagnostic Observation Schedule; NA, not available

**Supplementary Table 2. Participants profiles based on ADOS modules**

|                                  | Number of participants (n) | Age, mean (SD) |
|----------------------------------|----------------------------|----------------|
| <b>ABIDE-I ADOS<sup>1</sup></b>  |                            |                |
| Module 2                         | 1                          | 18.4 (NA)      |
| Module 3                         | 40                         | 14.4 (3.67)    |
| Module 4                         | 59                         | 24.9 (7.26)    |
| Not specified                    | 7                          | 23.7 (9.8)     |
| <b>ABIDE-II ADOS<sup>1</sup></b> |                            |                |
| Module 2                         | 3                          | 7.84 (4.46)    |
| Module 3                         | 30                         | 9.09 (3.28)    |
| Module 4                         | 24                         | 16.4 (5.97)    |
| Not specified                    | NA                         | NA             |

<sup>1</sup>Scores were derived based on: Lord C, Risi S, Lambrecht L, Cook EH, Leventhal BL, DiLavore PC, Pickles A, Rutter M. The Autism Diagnostic Observation Schedule—Generic: A standard measure of social and communication deficits associated with the spectrum of autism. *Journal of autism and developmental disorders*. 2000 Jun;30(3):205-23.

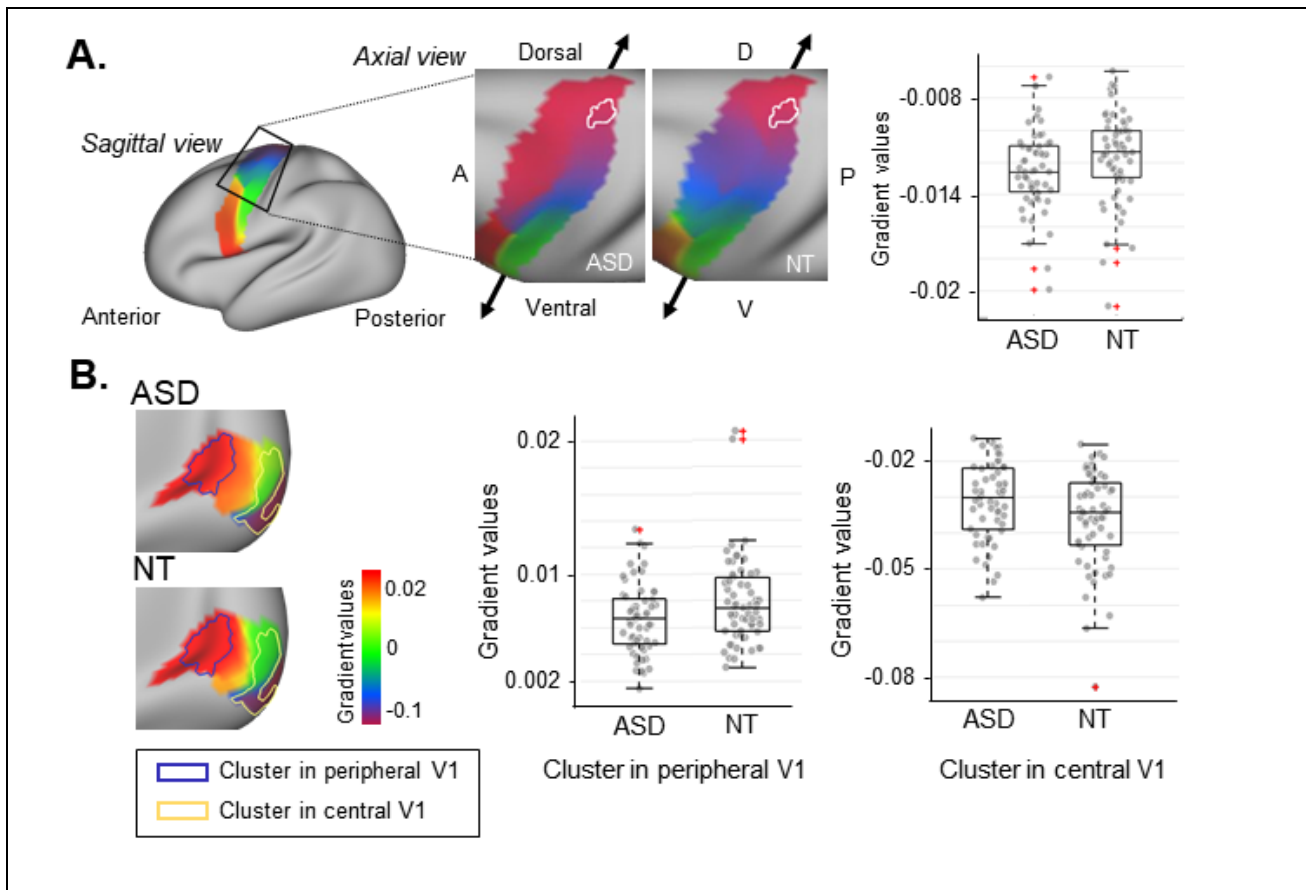

**Supplementary figure 1. Replication of functional connectopic gradient analysis using the ABIDE-II dataset.** (a) The cluster that showed significant group difference in  $M1_{Upper}$  is marked in solid, white outlines. As in the ABIDE-I dataset, more extreme negative gradient scores were found in the ASD group, indicating an abnormally more segregated intrinsic functional connectivity (iFC). (b) The clusters that showed significant group differences in  $V1_{Central}$  and  $V1_{Peripheral}$  are marked in yellow and blue solid outlines, respectively. ASD, autism spectrum disorder; NT, neurotypical control

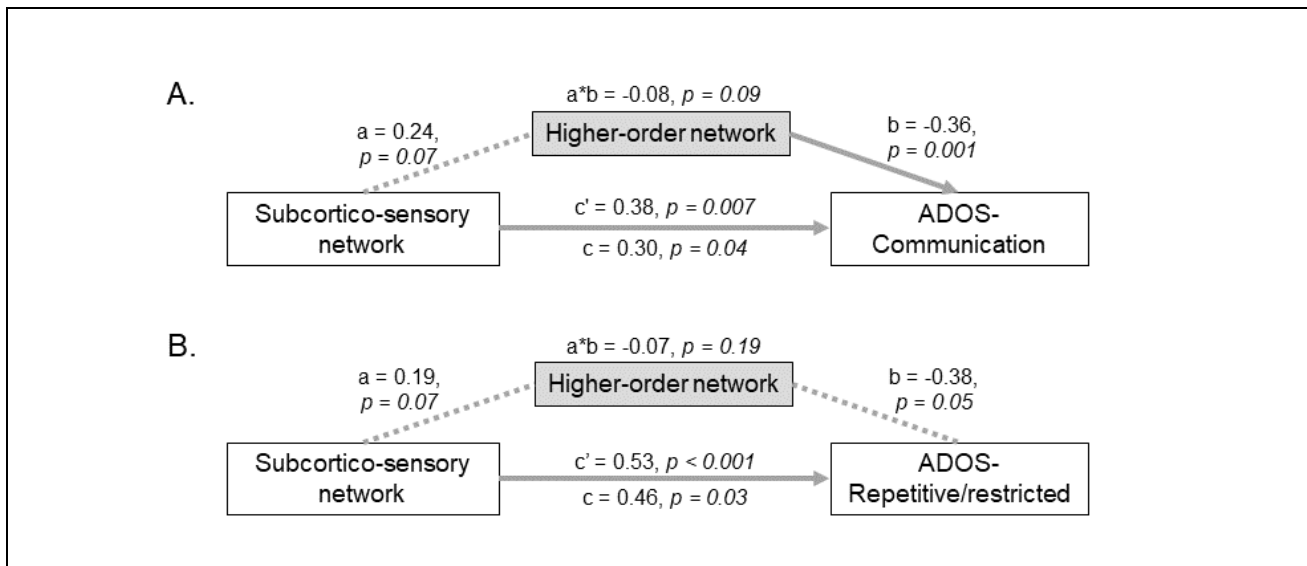

**Supplementary figure 2. Mediation models tested with subcortico-sensory/motor as predictor.** A series of mediation analyses with subcortico-sensory/motor network as the predictor and high-order network as the mediator were tested. The mediation model was not significant for **A)** ADOS-Communication and **B)** ADOS-Repetitive/restricted behaviors. The predictor did not have any significant iFCs with ADOS-Total and ADOS-Social. ADOS, Autism Diagnostic Observation Schedule, iFC, intrinsic functional connectivity

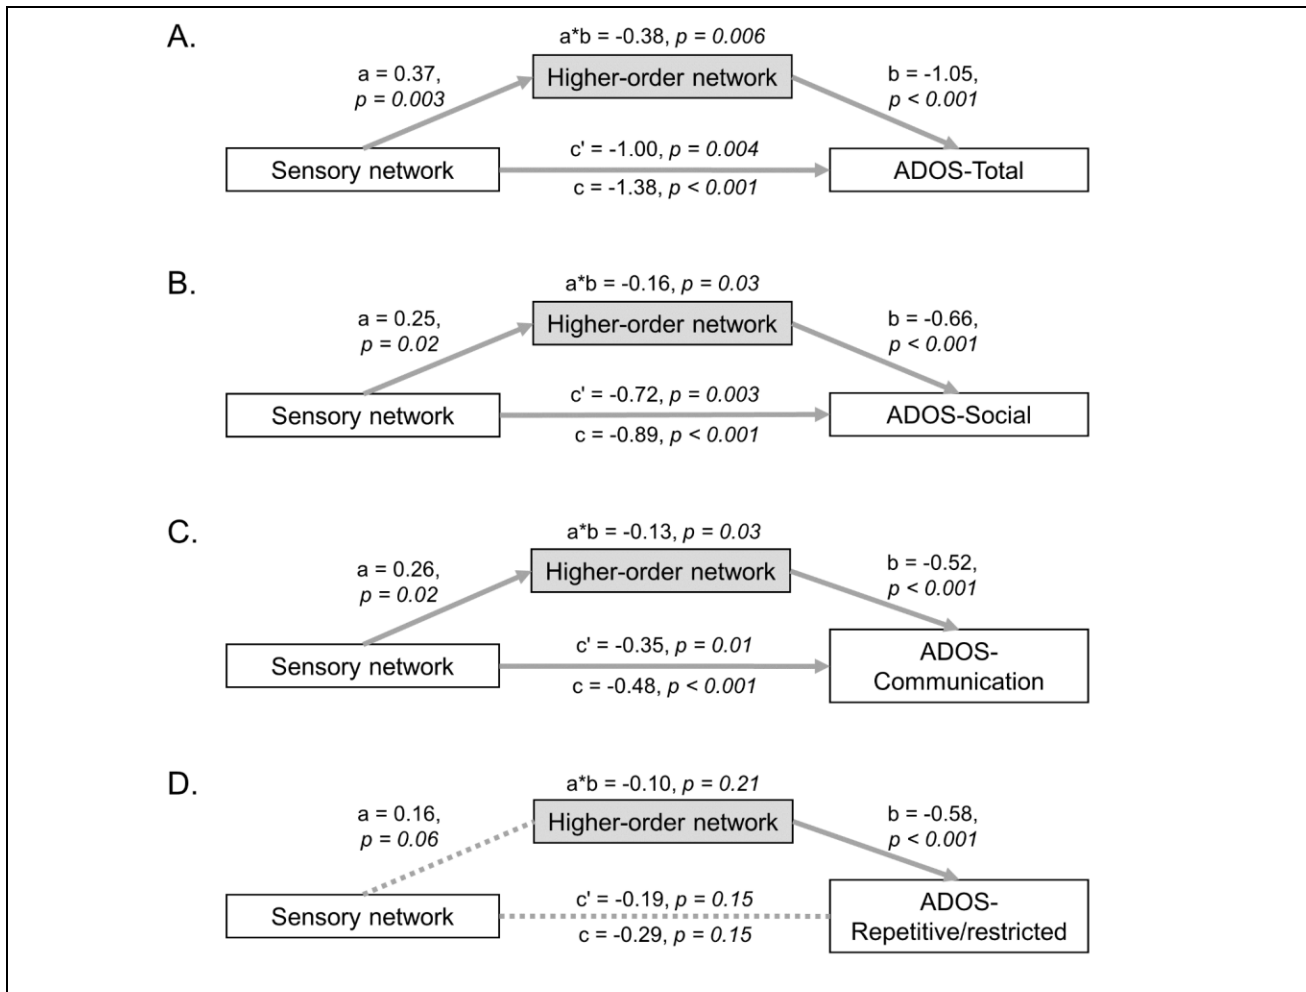

**Supplementary figure 3. Mediation models tested after global signal mean regression.** A series of mediation analyses with low-level sensory network as the predictor and high-order network as the mediator were tested with ADOS-total and subscores. As in the main analysis, the mediation effect for **A)** ADOS-Total and **B)** ADOS-Social was significant. The mediation model was significant for **C)** ADOS-Communication, only after global signal mean regression. Both mediation models, regardless of global signal mean regression, were not significant for **D)** ADOS-Repetitive/restricted behaviors. ADOS, Autism Diagnostic Observation Schedule
